# Supplementary material for: Piperazine-modified ammonium polyphosphate as monocomponent flame-retardant hardener for epoxy resin: flame retardance, curing behavior and mechanical property
Source: Royal Society of Chemistry journal article supplement (doi:10.1039/c6py00434b), 2016-01-01
Supplement: c6py00434b1.pdf [file c6py00434b1.pdf]

## SUPPORTING INFORMATION

### **Piperazine-Modified Ammonium Polyphosphate as Monocomponent Flame-Retardant Hardener for Epoxy Resin: Flame Retardance, Curing Behavior and Mechanical Property**

Yi Tan, Zhu-Bao Shao, Lei-Xiao Yu, Jia-Wei Long, Min Qi, Li Chen,\* and Yu-Zhong Wang\*

*Center for Degradable and Flame-Retardant Polymeric Materials, College of Chemistry, State Key Laboratory of Polymer Materials Engineering, National Engineering Laboratory of Eco-Friendly Polymeric Materials (Sichuan), Sichuan University, Chengdu 610064, China. E-mail: l.chen.scu@gmail.com (L Chen), yzwang@scu.edu.cn (YZ Wang); Fax: +86-28-85410755*

**Figure S1.** XPS spectra ( $N_{1s}$ ) of PAz-APP.

**Figure S2.** FTIR spectra of APP and PAz-APP.

**Figure S3.**  $^1H$  and  $^{13}C$ -NMR spectra of APP, PAz and PAz-APP, for comparison, physical mixture of PAz and APP (PAz+APP) was also recorded.

**Table S1.** Elemental contents of APP and PAz-APP.

**Table S2.** The corresponding structures of each binding energy in XPS testing.

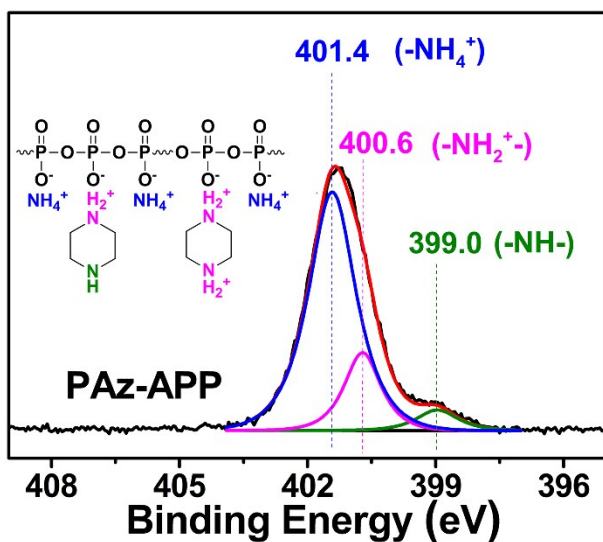

**Figure S1.** XPS spectra (N<sub>1s</sub>) of PAz-APP.

There were three binding energy peaks appeared in this spectrum, meaning the existence of three different nitrogen chemical structures in PAz-APP. The binding energy at 401.5 eV corresponded to NH<sub>4</sub><sup>+</sup>. The characteristic binding energy of new formed -NH<sub>2</sub><sup>+-</sup> group was located at 400.6 eV. The peak at 399.0 eV was ascribed to the -NH- group, unambiguously indicated the existing of secondary amino structure in modified APP.

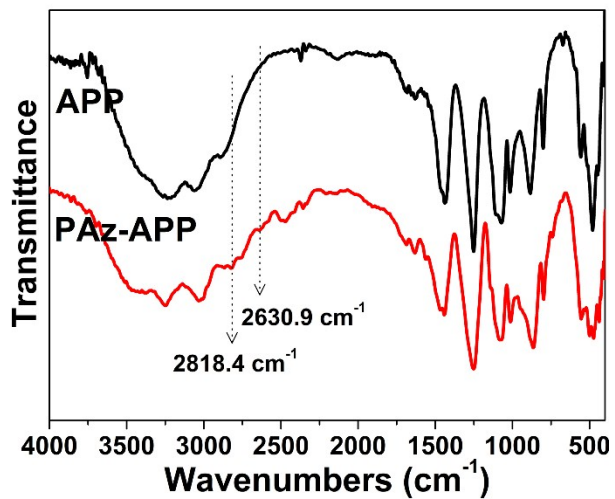

**Figure S2.** FTIR spectra of APP and PAz-APP.

In the FTIR spectra, compared with APP, the new weak peaks at 2630.9 and 2818.4 cm<sup>-1</sup> of PAz-APP were ascribed to the vibration of  $-\text{NH}_2^+$  and  $-\text{CH}_2-$ , respectively. This means that the piperazine salt ( $\text{R-NH}_2^+$ ), instead of ammonium salt ( $\text{NH}_4^+$ ), was formed after modification reaction between PAz and APP.

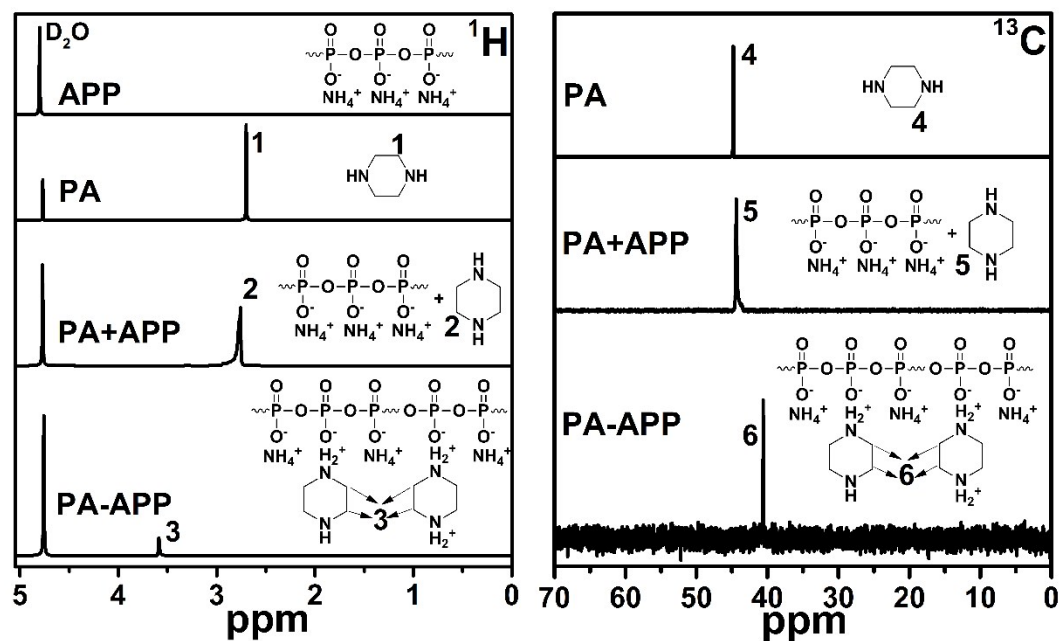

**Figure S3.**  $^1\text{H}$  and  $^{13}\text{C}$ -NMR spectra of APP, PAz and PAz-APP, for comparison, physical mixture of PAz and APP (PAz+APP) was also recorded.

To further confirm the chemical structure of functional PAz-APP,  $^1\text{H}$  and  $^{13}\text{C}$ -NMR were conducted. For comparison, both the APP, PAz, PAz-APP and physical mixture of PAz and APP (PAz+APP) were tested. These shifts extensively indicated the successful cation exchange reaction between PAz-APP and PAz.

**Table S1.** Elemental contents of APP and PAz-APP.

|         | C (%) | N (%) | H (%) | P (%) |
|---------|-------|-------|-------|-------|
| II-APP  | 0.1   | 13.0  | 4.2   | 28.9  |
| PAz-APP | 11.5  | 12.5  | 5.5   | 23.3  |

After cation exchange reaction with PAz, the corresponding elemental contents in PAz-APP all changed more or less. Particularly, the content of C greatly increased from 0.1 % to 11.5 %. Conversely, the P content in PAz-APP was obviously decreased from 28.9 % to 23.3 %. Both predicting results remarkably demonstrated the successful reaction between PAz and APP.

**Table S2.** The corresponding structures of each binding energy in XPS testing.

| binding energy (eV) | the corresponding structure                        |
|---------------------|----------------------------------------------------|
| 132.9               | organic or inorganic phosphates                    |
| 133.7               | P-O-P                                              |
| 133.9               | phosphorus oxides                                  |
| 134.3               | the further crosslinking of phosphoric acid        |
| 135.0               | phosphorus oxides                                  |
| 284.5               | C-H, C-C in aliphatic and aromatic groups          |
| 285.2               | C=C                                                |
| 286.2               | C-O-C, C-OH, or C-N                                |
| 286.6               | C-O-C, C-OH, or C-N                                |
| 397.0               | nitrogen oxides                                    |
| 398.3               | -N= group in a cyclic structure                    |
| 398.9               | -C=NH or N-C groups (pyridinic N in initial resin) |
| 399.0               | -NH-                                               |
| 399.6               | tertiary amino groups                              |
| 399.7               | P-N-P                                              |
| 400.6               | R-NH <sub>2</sub> <sup>+</sup>                     |
| 401.4               | NH <sub>4</sub> <sup>+</sup>                       |

---

|       |                       |
|-------|-----------------------|
| 530.6 | oxides in the residue |
| 531.6 | O=P, O=C              |
| 532.0 | -OH                   |
| 532.5 | the ether bonds       |
| 532.8 | C-O                   |
| 533.1 | P-O-P, C-O-P          |
| 534.3 | C-O                   |
| 538.6 | C-O                   |

---
